# Supplementary material
Source: PubMed Central journal article supplement (PMC124968)

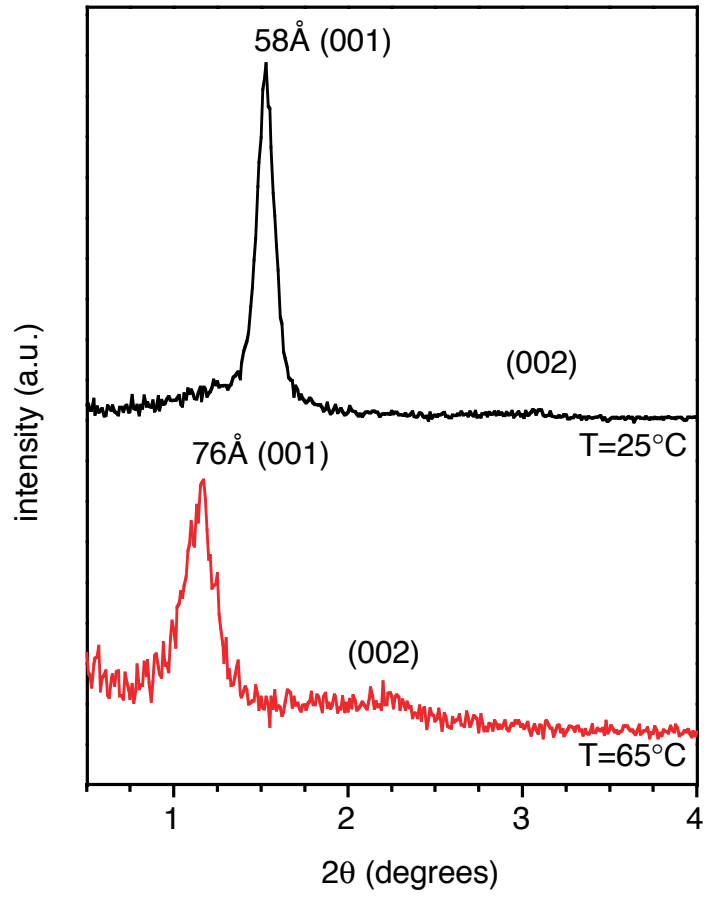

Supplement: pnas_152667399_2.pdf [file pnas_152667399_2.pdf]
